# Supplementary material for: Robust colour constancy in red-green dichromats
Source: PubMed Central journal article supplement (PMC5491172; doi:10.1371/journal.pone.0180310), 2017-06-29
Supplement: pone.0180310.s003.pdf [file pone.0180310.s003.pdf]

Experiment 1

| Diagnosis | Id | CCT_Im1_Down | CCT_Im1_Up | CCT_Im2_Down | CCT_Im2_Up | CCT_Im3_Down | CCT_Im3_Up | CCT_Im4_Down | CCT_Im4_Up |
|-----------|----|--------------|------------|--------------|------------|--------------|------------|--------------|------------|
| 3         | N1 | 199.25       | 124.25     | 174.25       | 99.25      | 174.25       | 124.25     | 174.25       | 124.25     |
| 3         | N2 | 174.25       | 99.25      | 174.25       | 99.25      | 174.25       | 99.25      | 174.25       | 124.25     |
| 3         | N3 | 174.25       | 124.25     | 174.25       | 124.25     | 174.25       | 124.25     | 174.25       | 124.25     |
| 3         | N4 | 174.25       | 124.25     | 174.25       | 124.25     | 174.25       | 124.25     | 160.79       | 135.61     |
| 1         | P1 | 174.25       | 99.25      | 199.25       | 99.25      | 160.79       | 124.25     | 199.25       | 99.25      |
| 1         | P2 | 174.25       | 74.25      | 174.25       | 74.25      | 224.25       | 99.25      | 199.25       | 124.25     |
| 1         | P3 | 199.25       | 99.25      | 174.25       | 99.25      | 199.25       | 124.25     | 160.79       | 135.61     |
| 2         | D1 | 174.25       | 124.25     | 199.25       | 99.25      | 199.25       | 124.25     | 199.25       | 99.25      |
| 2         | D2 | 174.25       | 124.25     | 199.25       | 124.25     | 174.25       | 124.25     | 174.25       | 124.25     |
| 2         | D3 | 174.25       | 124.25     | 174.25       | 49.25      | 174.25       | 99.25      | 174.25       | 124.25     |
| 2         | D4 | 174.25       | 99.25      | 174.25       | 99.25      | 199.25       | 99.25      | 174.25       | 99.25      |

| Diagnosis | Id | Lum_Im1_Down | Lum_Im1_Up | Lum_Im2_Down | Lum_Im2_Up | Lum_Im3_Down | Lum_Im3_Up | Lum_Im4_Down | Lum_Im4_Up |
|-----------|----|--------------|------------|--------------|------------|--------------|------------|--------------|------------|
| 3         | N1 | 6.00         | 13.00      | 7.00         | 13.00      | 7.00         | 13.00      | 7.00         | 11.00      |
| 3         | N2 | 7.00         | 12.00      | 9.00         | 15.00      | 8.00         | 12.00      | 8.00         | 13.00      |
| 3         | N3 | 7.00         | 12.00      | 8.00         | 15.00      | 7.00         | 13.00      | 8.00         | 13.00      |
| 3         | N4 | 7.00         | 14.00      | 8.00         | 13.00      | 7.00         | 14.00      | 8.00         | 14.00      |
| 1         | P1 | 6.00         | 15.00      | 8.00         | 15.00      | 6.00         | 15.00      | 7.00         | 15.00      |
| 1         | P2 | 6.00         | 13.00      | 7.00         | 14.00      | 7.00         | 15.00      | 7.00         | 15.00      |
| 1         | P3 | 7.00         | 12.00      | 6.00         | 13.00      | 6.00         | 13.00      | 7.00         | 13.00      |
| 2         | D1 | 7.00         | 13.00      | 7.00         | 13.00      | 8.00         | 13.00      | 8.00         | 12.00      |
| 2         | D2 | 7.00         | 12.00      | 8.00         | 12.00      | 7.00         | 13.00      | 7.00         | 13.00      |
| 2         | D3 | 7.00         | 12.00      | 7.00         | 14.00      | 8.00         | 14.00      | 8.00         | 14.00      |
| 2         | D4 | 7.00         | 15.00      | 7.00         | 15.00      | 6.00         | 14.00      | 6.00         | 15.00      |

| Diagnosis | Id | IncE_Down | IncE_Up | IncE_Ydiscrim | IncE_Bdiscrim |
|-----------|----|-----------|---------|---------------|---------------|
| 3         | N1 | 20.13     | 22.18   | 2.99          | 5.68          |
| 3         | N2 | 16.51     | 30.75   | 4.63          | 5.84          |
| 3         | N3 | 16.51     | 17.10   | 3.73          | 4.45          |
| 3         | N4 | 14.19     | 15.26   | 2.10          | 5.42          |
| 1         | P1 | 21.37     | 30.75   | 8.76          | 10.11         |
| 1         | P2 | 27.05     | 41.58   | 7.16          | 9.11          |
| 1         | P3 | 21.37     | 25.26   | 5.94          | 5.20          |
| 2         | D1 | 27.96     | 26.71   | 7.54          | 8.08          |
| 2         | D2 | 20.13     | 17.10   | 5.94          | 5.20          |
| 2         | D3 | 16.51     | 43.43   | 9.49          | 6.45          |
| 2         | D4 | 20.13     | 34.38   | 7.64          | 6.13          |

Note. N, P and D stand for Normal, Protanope and Deuteranope
