# Supplementary material for: Robust colour constancy in red-green dichromats
Source: PubMed Central journal article supplement (PMC5491172; doi:10.1371/journal.pone.0180310), 2017-06-29
Supplement: pone.0180310.s004.pdf [file pone.0180310.s004.pdf]

Experiment 2

| Diagnosis | Id | CCT_Im1_Up | CCT_Im1_Down | CCT_Im2_Up | CCT_Im2_Down | CCT_Im3_Up | CCT_Im3_Down | CCT_Im4_Up | CCT_Im4_Down |
|-----------|----|------------|--------------|------------|--------------|------------|--------------|------------|--------------|
| 3         | N1 | 1.00       | 1.00         | 1.00       | 1.00         | 1.00       | 1.00         | 1.00       | 1.00         |
| 3         | N2 | 1.00       | 1.00         | 1.00       | 1.00         | 1.00       | 0.90         | 0.90       | 1.00         |
| 3         | N3 | 0.70       | 0.50         | 0.80       | 0.30         | 0.70       | 0.90         | 0.40       | 0.70         |
| 3         | N4 | 0.30       | 1.00         | 1.00       | 1.00         | 0.90       | 0.90         | 0.90       | 1.00         |
| 1         | P1 | 0.10       | 1.00         | 0.00       | 1.00         | 1.00       | 1.00         | 1.00       | 1.00         |
| 1         | P2 | 1.00       | 0.90         | 0.00       | 0.70         | 0.60       | 1.00         | 0.90       | 0.90         |
| 1         | P3 | 1.00       | 1.00         | 0.30       | 1.00         | 0.40       | 1.00         | 0.20       | 1.00         |
| 2         | D1 | 1.00       | 1.00         | 0.90       | 1.00         | 1.00       | 1.00         | 1.00       | 1.00         |
| 2         | D2 | 1.00       | 1.00         | 0.80       | 0.90         | 1.00       | 1.00         | 1.00       | 1.00         |
| 2         | D3 | 0.50       | 0.90         | 0.90       | 0.20         | 0.60       | 1.00         | 0.10       | 0.40         |
| 2         | D4 | 1.00       | 1.00         | 0.00       | 1.00         | 1.00       | 1.00         | 1.00       | 1.00         |

| Diagnosis | Id | Lum_Im1_Up | Lum_Im1_Down | Lum_Im2_Up | Lum_Im2_Down | Lum_Im3_Up | Lum_Im3_Down | Lum_Im4_Up | Lum_Im4_Down |
|-----------|----|------------|--------------|------------|--------------|------------|--------------|------------|--------------|
| 3         | N1 | 1.00       | 1.00         | 1.00       | 1.00         | 1.00       | 1.00         | 1.00       | 1.00         |
| 3         | N2 | 1.00       | 1.00         | 1.00       | 1.00         | 1.00       | 0.90         | 1.00       | 1.00         |
| 3         | N3 | 0.70       | 0.50         | 0.60       | 0.70         | 0.70       | 0.90         | 0.60       | 0.70         |
| 3         | N4 | 1.00       | 1.00         | 0.90       | 0.90         | 1.00       | 1.00         | 1.00       | 1.00         |
| 1         | P1 | 0.80       | 0.10         | 0.30       | 0.10         | 0.30       | 0.70         | 0.20       | 0.90         |
| 1         | P2 | 1.00       | 0.90         | 1.00       | 0.90         | 1.00       | 0.80         | 0.80       | 0.50         |
| 1         | P3 | 1.00       | 1.00         | 1.00       | 1.00         | 1.00       | 1.00         | 1.00       | 1.00         |
| 2         | D1 | 1.00       | 1.00         | 1.00       | 1.00         | 1.00       | 1.00         | 1.00       | 0.90         |
| 2         | D2 | 0.90       | 1.00         | 1.00       | 1.00         | 1.00       | 1.00         | 1.00       | 1.00         |
| 2         | D3 | 1.00       | 0.00         | 1.00       | 0.00         | 0.90       | 0.00         | 1.00       | 0.00         |
| 2         | D4 | 1.00       | 0.80         | 0.60       | 0.80         | 1.00       | 0.90         | 0.80       | 0.90         |

Note. N, P and D stand for Normal, Protanope and Deuteranope
